# Supplementary material for: Temporal phylogeography of Yersinia pestis in Madagascar: Insights into the long-term maintenance of plague
Source: PubMed Central journal article supplement (PMC5600411; doi:10.1371/journal.pntd.0005887), 2017-09-05

## A Root to tip distances

| tip    | date | distance |
|--------|------|----------|
| CO92   | 1992 | 0        |
| Yp3016 | 2007 | 0.187425 |
| Yp3042 | 2009 | 0.207046 |
| Yp3026 | 2008 | 0.2064   |
| Yp2979 | 2006 | 0.180758 |
| Yp3009 | 2007 | 0.193704 |
| Yp3017 | 2007 | 0.198363 |
| Yp2963 | 2006 | 0.215405 |
| Yp3078 | 2011 | 0.225177 |
| Yp3019 | 2008 | 0.213996 |
| Yp3043 | 2009 | 0.215779 |
| Yp3048 | 2009 | 0.194128 |
| Yp2856 | 2003 | 0.194363 |
| Yp2905 | 2004 | 0.191381 |
| Yp3010 | 2007 | 0.188107 |
| Yp3069 | 2011 | 0.202091 |
| IP275  | 1995 | 0.22056  |
| Yp3023 | 2008 | 0.194563 |
| Yp3045 | 2009 | 0.194838 |
| Yp3050 | 2010 | 0.181486 |
| Yp3083 | 2012 | 0.188664 |
| Yp2872 | 2004 | 0.180998 |
| Yp2991 | 2007 | 0.191697 |
| Yp3059 | 2011 | 0.185237 |
| Yp2983 | 2007 | 0.184644 |
| Yp3041 | 2009 | 0.181849 |
| Yp2871 | 2004 | 0.206262 |
| Yp3044 | 2009 | 0.182406 |
| Yp3079 | 2012 | 0.183719 |
| Yp3014 | 2007 | 0.199922 |
| Yp2947 | 2006 | 0.195331 |
| Yp3034 | 2008 | 0.216492 |
| Yp2988 | 2007 | 0.127168 |

## B Correlation: Distance and Date

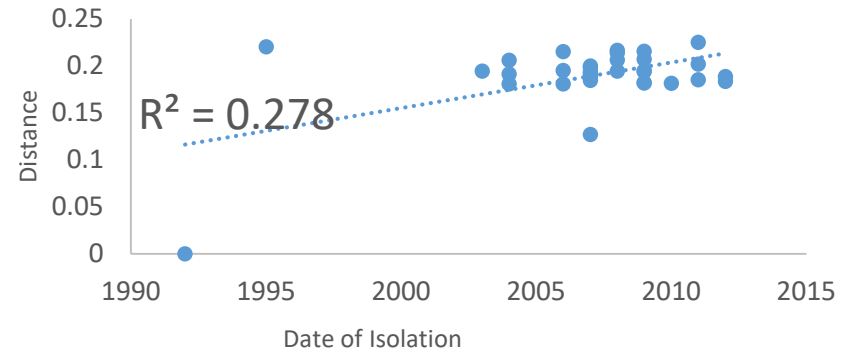

## C

Density Distribution of Correlation Coefficients Calculated from Permuted Distances

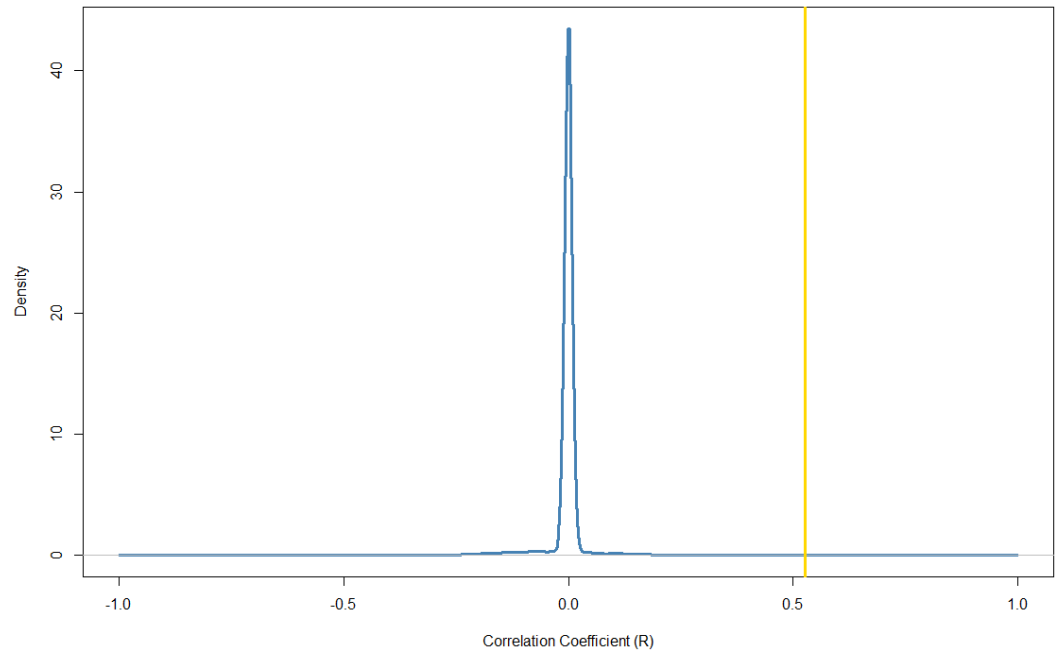

Supplement: pntd.0005887.s003.pdf [file pntd.0005887.s003.pdf]
