# Supplementary material for: Temporal phylogeography of Yersinia pestis in Madagascar: Insights into the long-term maintenance of plague
Source: PLoS Negl Trop Dis. 2017 Sep 5;11(9):e0005887. doi: 10.1371/journal.pntd.0005887 (PMC5600411; doi:10.1371/journal.pntd.0005887)
Supplement: S3 Table — (XLSX) [file pntd.0005887.s006.xlsx]

## Sheet: S3Table
SNP IDa	Used Hereb	Primer ID	Primerc	Multiplex mix	Primer name	Universal Tail	Unique primer sequence	Final sequence
7167	No	9	F	4	F_7167_YpMadaAmpseqUT_9	ACCCAACTGAATGGAGC	ATGGTCTTGTTGATTATCGA	ACCCAACTGAATGGAGCATGGTCTTGTTGATTATCGA
7167	No	277	R	4	R_7167_YpMadaAmpseqUT_277	ACGCACTTGACTTGTCTTC	AATGCAAATGGAATGACATT	ACGCACTTGACTTGTCTTCAATGCAAATGGAATGACATT
8479	No	9	F	4	F_8479_YpMadaAmpseqUT_9	ACCCAACTGAATGGAGC	AAATTTCAAGGACAAAGGAA	ACCCAACTGAATGGAGCAAATTTCAAGGACAAAGGAA
8479	No	287	R	4	R_8479_YpMadaAmpseqUT_287	ACGCACTTGACTTGTCTTC	TGAGTATCAATCTTATCGGC	ACGCACTTGACTTGTCTTCTGAGTATCAATCTTATCGGC
8614	No	4	F	2	F_8614_YpMadaAmpseqUT_4	ACCCAACTGAATGGAGC	TATAACGTTGCTTTCGGAG	ACCCAACTGAATGGAGCTATAACGTTGCTTTCGGAG
8614	No	274	R	2	R_8614_YpMadaAmpseqUT_274	ACGCACTTGACTTGTCTTC	GAAGATACTCTGGTGTCAC	ACGCACTTGACTTGTCTTCGAAGATACTCTGGTGTCAC
22682	Yes	16	F	3	F_22682_YpMadaAmpseqUT_16	ACCCAACTGAATGGAGC	AGATATTGTCGGTTATGAGT	ACCCAACTGAATGGAGCAGATATTGTCGGTTATGAGT
22682	Yes	274	R	3	R_22682_YpMadaAmpseqUT_274	ACGCACTTGACTTGTCTTC	TCCTAAAGATCTAACCTGTG	ACGCACTTGACTTGTCTTCTCCTAAAGATCTAACCTGTG
24930	Yes	22	F	1	F_24930_YpMadaAmpseqUT_22	ACCCAACTGAATGGAGC	AAGGTGATTCTGGAATATCG	ACCCAACTGAATGGAGCAAGGTGATTCTGGAATATCG
24930	Yes	292	R	1	R_24930_YpMadaAmpseqUT_292	ACGCACTTGACTTGTCTTC	CCATAATACGCAGTTCAATT	ACGCACTTGACTTGTCTTCCCATAATACGCAGTTCAATT
35181	No	6	F	2	F_35181_YpMadaAmpseqUT_6	ACCCAACTGAATGGAGC	TTTAGTCCCTCGCTTAATAC	ACCCAACTGAATGGAGCTTTAGTCCCTCGCTTAATAC
35181	No	277	R	2	R_35181_YpMadaAmpseqUT_277	ACGCACTTGACTTGTCTTC	GCGGTAGTCTTTCCAATTAA	ACGCACTTGACTTGTCTTCGCGGTAGTCTTTCCAATTAA
44518	No	48	F	2	F_44518_YpMadaAmpseqUT_48	ACCCAACTGAATGGAGC	GCAAATTGCAAAATCAATGG	ACCCAACTGAATGGAGCGCAAATTGCAAAATCAATGG
44518	No	297	R	2	R_44518_YpMadaAmpseqUT_297	ACGCACTTGACTTGTCTTC	GTTATGTCGGTTTTGTTGT	ACGCACTTGACTTGTCTTCGTTATGTCGGTTTTGTTGT
52376	Yes	46	F	2	F_52376_YpMadaAmpseqUT_46	ACCCAACTGAATGGAGC	GAGTGATATAAGGCTCACC	ACCCAACTGAATGGAGCGAGTGATATAAGGCTCACC
52376	Yes	299	R	2	R_52376_YpMadaAmpseqUT_299	ACGCACTTGACTTGTCTTC	CAGATTCTCGATGTTCGT	ACGCACTTGACTTGTCTTCCAGATTCTCGATGTTCGT
54739	No	15	F	4	F_54739_YpMadaAmpseqUT_15	ACCCAACTGAATGGAGC	AGTTCTGGTTTCAAGCAC	ACCCAACTGAATGGAGCAGTTCTGGTTTCAAGCAC
54739	No	266	R	4	R_54739_YpMadaAmpseqUT_266	ACGCACTTGACTTGTCTTC	CAATATTCACTCGACGAATC	ACGCACTTGACTTGTCTTCCAATATTCACTCGACGAATC
54774	No	21	F	3	F_54774_YpMadaAmpseqUT_21	ACCCAACTGAATGGAGC	GTTGTGGTCAGGCAAGAG	ACCCAACTGAATGGAGCGTTGTGGTCAGGCAAGAG
54774	No	287	R	3	R_54774_YpMadaAmpseqUT_287	ACGCACTTGACTTGTCTTC	CAATGTAATGTGATCACCAG	ACGCACTTGACTTGTCTTCCAATGTAATGTGATCACCAG
55006	No	36	F	4	F_55006_YpMadaAmpseqUT_36	ACCCAACTGAATGGAGC	CTGGTGATCACATTACATTG	ACCCAACTGAATGGAGCCTGGTGATCACATTACATTG
55006	No	292	R	4	R_55006_YpMadaAmpseqUT_292	ACGCACTTGACTTGTCTTC	TAACTCATGGTGAATAAGCT	ACGCACTTGACTTGTCTTCTAACTCATGGTGAATAAGCT
56766	Yes	26	F	2	F_56766_YpMadaAmpseqUT_26	ACCCAACTGAATGGAGC	GGTTGAATTCTTGCATCATA	ACCCAACTGAATGGAGCGGTTGAATTCTTGCATCATA
56766	Yes	283	R	2	R_56766_YpMadaAmpseqUT_283	ACGCACTTGACTTGTCTTC	CTGAAGTGGTTAAAGTCCG	ACGCACTTGACTTGTCTTCCTGAAGTGGTTAAAGTCCG
63210	Yes	4	F	1	F_63210_YpMadaAmpseqUT_4	ACCCAACTGAATGGAGC	ACGTACTCTATAAAGAAGCT	ACCCAACTGAATGGAGCACGTACTCTATAAAGAAGCT
63210	Yes	258	R	1	R_63210_YpMadaAmpseqUT_258	ACGCACTTGACTTGTCTTC	TTGATCGCTAAGTGTTAGAA	ACGCACTTGACTTGTCTTCTTGATCGCTAAGTGTTAGAA
69070	No	3	F	3	F_69070_YpMadaAmpseqUT_3	ACCCAACTGAATGGAGC	CTTTGCGACATCATCATATC	ACCCAACTGAATGGAGCCTTTGCGACATCATCATATC
69070	No	271	R	3	R_69070_YpMadaAmpseqUT_271	ACGCACTTGACTTGTCTTC	GTGGATTATCACCAAAGTG	ACGCACTTGACTTGTCTTCGTGGATTATCACCAAAGTG
70311	No	23	F	2	F_70311_YpMadaAmpseqUT_23	ACCCAACTGAATGGAGC	GAAATGTCCCTACCTTGTAA	ACCCAACTGAATGGAGCGAAATGTCCCTACCTTGTAA
70311	No	295	R	2	R_70311_YpMadaAmpseqUT_295	ACGCACTTGACTTGTCTTC	GGTACCACAGATAAAGCG	ACGCACTTGACTTGTCTTCGGTACCACAGATAAAGCG
73535	No	19	F	2	F_73535_YpMadaAmpseqUT_19	ACCCAACTGAATGGAGC	ACCAAAATCGTCAATAACAA	ACCCAACTGAATGGAGCACCAAAATCGTCAATAACAA
73535	No	296	R	2	R_73535_YpMadaAmpseqUT_296	ACGCACTTGACTTGTCTTC	CAAAGTGCCTTGGTCAAT	ACGCACTTGACTTGTCTTCCAAAGTGCCTTGGTCAAT
77519	Yes	20	F	2	F_77519_YpMadaAmpseqUT_20	ACCCAACTGAATGGAGC	TTAACTGAGGTGTATCCATG	ACCCAACTGAATGGAGCTTAACTGAGGTGTATCCATG
77519	Yes	294	R	2	R_77519_YpMadaAmpseqUT_294	ACGCACTTGACTTGTCTTC	ACTGACGAGTTAAAGCAG	ACGCACTTGACTTGTCTTCACTGACGAGTTAAAGCAG
86617	Yes	31	F	4	F_86617_YpMadaAmpseqUT_31	ACCCAACTGAATGGAGC	AGACGGCTCTGAAAATTG	ACCCAACTGAATGGAGCAGACGGCTCTGAAAATTG
86617	Yes	281	R	4	R_86617_YpMadaAmpseqUT_281	ACGCACTTGACTTGTCTTC	GAGCGGTATCAGAAAGTG	ACGCACTTGACTTGTCTTCGAGCGGTATCAGAAAGTG
87104	No	1	F	3	F_87104_YpMadaAmpseqUT_1	ACCCAACTGAATGGAGC	CCGATGTTCACTTTTGTTAT	ACCCAACTGAATGGAGCCCGATGTTCACTTTTGTTAT
87104	No	290	R	3	R_87104_YpMadaAmpseqUT_290	ACGCACTTGACTTGTCTTC	TGATCAGTAAGATTGATGCT	ACGCACTTGACTTGTCTTCTGATCAGTAAGATTGATGCT
87110	No	5	F	4	F_87110_YpMadaAmpseqUT_5	ACCCAACTGAATGGAGC	CTTTTGTTATACACACGACC	ACCCAACTGAATGGAGCCTTTTGTTATACACACGACC
87110	No	284	R	4	R_87110_YpMadaAmpseqUT_284	ACGCACTTGACTTGTCTTC	TGATCAGTAAGATTGATGCT	ACGCACTTGACTTGTCTTCTGATCAGTAAGATTGATGCT
97414	Yes	9	F	2	F_97414_YpMadaAmpseqUT_9	ACCCAACTGAATGGAGC	GTTGATTGCAAGCAGTTTA	ACCCAACTGAATGGAGCGTTGATTGCAAGCAGTTTA
97414	Yes	261	R	2	R_97414_YpMadaAmpseqUT_261	ACGCACTTGACTTGTCTTC	GTTTGATTTGACCTTGGTTA	ACGCACTTGACTTGTCTTCGTTTGATTTGACCTTGGTTA
102519	Yes	3	F	2	F_102519_YpMadaAmpseqUT_3	ACCCAACTGAATGGAGC	TTGGCTCATAATAATGTCCT	ACCCAACTGAATGGAGCTTGGCTCATAATAATGTCCT
102519	Yes	288	R	2	R_102519_YpMadaAmpseqUT_288	ACGCACTTGACTTGTCTTC	GACTATCAGCAAAGACTGAA	ACGCACTTGACTTGTCTTCGACTATCAGCAAAGACTGAA
116301	Yes	25	F	2	F_116301_YpMadaAmpseqUT_25	ACCCAACTGAATGGAGC	CCCTGATGATTAATTCGGTA	ACCCAACTGAATGGAGCCCCTGATGATTAATTCGGTA
116301	Yes	291	R	2	R_116301_YpMadaAmpseqUT_291	ACGCACTTGACTTGTCTTC	CCACTGCAATATTTTCTCAC	ACGCACTTGACTTGTCTTCCCACTGCAATATTTTCTCAC
144726	Yes	30	F	3	F_144726_YpMadaAmpseqUT_30	ACCCAACTGAATGGAGC	ATGCATATAAGCCTCTTGAA	ACCCAACTGAATGGAGCATGCATATAAGCCTCTTGAA
144726	Yes	298	R	3	R_144726_YpMadaAmpseqUT_298	ACGCACTTGACTTGTCTTC	TACATCATTCTCATTTGCGA	ACGCACTTGACTTGTCTTCTACATCATTCTCATTTGCGA
157215	Yes	51	F	4	F_157215_YpMadaAmpseqUT_51	ACCCAACTGAATGGAGC	GCGATCAGACTGGTCAAC	ACCCAACTGAATGGAGCGCGATCAGACTGGTCAAC
157215	Yes	300	R	4	R_157215_YpMadaAmpseqUT_300	ACGCACTTGACTTGTCTTC	TAGGATTATGCTGATATTGTGA	ACGCACTTGACTTGTCTTCTAGGATTATGCTGATATTGTGA
187365	Yes	47	F	2	F_187365_YpMadaAmpseqUT_47	ACCCAACTGAATGGAGC	GAATTCGGAAAAACTACAGG	ACCCAACTGAATGGAGCGAATTCGGAAAAACTACAGG
187365	Yes	297	R	2	R_187365_YpMadaAmpseqUT_297	ACGCACTTGACTTGTCTTC	GCAGGTCTTTCATATCCAG	ACGCACTTGACTTGTCTTCGCAGGTCTTTCATATCCAG
193804	Yes	9	F	2	F_193804_YpMadaAmpseqUT_9	ACCCAACTGAATGGAGC	GACCATAATTTTTACGCTGT	ACCCAACTGAATGGAGCGACCATAATTTTTACGCTGT
193804	Yes	258	R	2	R_193804_YpMadaAmpseqUT_258	ACGCACTTGACTTGTCTTC	GTAGGCAGTTATATTGGTGT	ACGCACTTGACTTGTCTTCGTAGGCAGTTATATTGGTGT
199378	Yes	36	F	2	F_199378_YpMadaAmpseqUT_36	ACCCAACTGAATGGAGC	ACTCCAAGCTAAATCGATAA	ACCCAACTGAATGGAGCACTCCAAGCTAAATCGATAA
199378	Yes	288	R	2	R_199378_YpMadaAmpseqUT_288	ACGCACTTGACTTGTCTTC	ATGAGATGGGTGCCTCTC	ACGCACTTGACTTGTCTTCATGAGATGGGTGCCTCTC
215373	No	19	F	3	F_215373_YpMadaAmpseqUT_19	ACCCAACTGAATGGAGC	AATAATGGCAACGATTAACC	ACCCAACTGAATGGAGCAATAATGGCAACGATTAACC
215373	No	299	R	3	R_215373_YpMadaAmpseqUT_299	ACGCACTTGACTTGTCTTC	CACCTGGCAAGTCTTTAA	ACGCACTTGACTTGTCTTCCACCTGGCAAGTCTTTAA
232640	Yes	8	F	4	F_232640_YpMadaAmpseqUT_8	ACCCAACTGAATGGAGC	ACATTCCTGATCAGAAACAT	ACCCAACTGAATGGAGCACATTCCTGATCAGAAACAT
232640	Yes	300	R	4	R_232640_YpMadaAmpseqUT_300	ACGCACTTGACTTGTCTTC	GTTGGTCTTAGTACGCTG	ACGCACTTGACTTGTCTTCGTTGGTCTTAGTACGCTG
264671	Yes	35	F	3	F_264671_YpMadaAmpseqUT_35	ACCCAACTGAATGGAGC	GCTAAATGACGATGATATTCA	ACCCAACTGAATGGAGCGCTAAATGACGATGATATTCA
264671	Yes	299	R	3	R_264671_YpMadaAmpseqUT_299	ACGCACTTGACTTGTCTTC	GAAAGGGGTTCACAATAAAC	ACGCACTTGACTTGTCTTCGAAAGGGGTTCACAATAAAC
317016	Yes	51	F	4	F_317016_YpMadaAmpseqUT_51	ACCCAACTGAATGGAGC	CTATTGGTTACGGGAAATTG	ACCCAACTGAATGGAGCCTATTGGTTACGGGAAATTG
317016	Yes	300	R	4	R_317016_YpMadaAmpseqUT_300	ACGCACTTGACTTGTCTTC	CTCAGTCAATAACAGTGGAT	ACGCACTTGACTTGTCTTCCTCAGTCAATAACAGTGGAT
319353	Yes	16	F	4	F_319353_YpMadaAmpseqUT_16	ACCCAACTGAATGGAGC	AGTATCTTTTGCATAGGGTG	ACCCAACTGAATGGAGCAGTATCTTTTGCATAGGGTG
319353	Yes	290	R	4	R_319353_YpMadaAmpseqUT_290	ACGCACTTGACTTGTCTTC	CATTGACGACCTACCTTAAT	ACGCACTTGACTTGTCTTCCATTGACGACCTACCTTAAT
334580	Yes	20	F	3	F_334580_YpMadaAmpseqUT_20	ACCCAACTGAATGGAGC	GCCAATGACTTTGAGTATAG	ACCCAACTGAATGGAGCGCCAATGACTTTGAGTATAG
334580	Yes	272	R	3	R_334580_YpMadaAmpseqUT_272	ACGCACTTGACTTGTCTTC	TAAACCAGTAAGTTTAACACG	ACGCACTTGACTTGTCTTCTAAACCAGTAAGTTTAACACG
367794	Yes	40	F	3	F_367794_YpMadaAmpseqUT_40	ACCCAACTGAATGGAGC	TGGATTTTCAAATCATGCAT	ACCCAACTGAATGGAGCTGGATTTTCAAATCATGCAT
367794	Yes	290	R	3	R_367794_YpMadaAmpseqUT_290	ACGCACTTGACTTGTCTTC	GATGAACCGATCTTCTGG	ACGCACTTGACTTGTCTTCGATGAACCGATCTTCTGG
405290	Yes	0	F	3	F_405290_YpMadaAmpseqUT_0	ACCCAACTGAATGGAGC	AATATGGTCACCTGATTAGC	ACCCAACTGAATGGAGCAATATGGTCACCTGATTAGC
405290	Yes	287	R	3	R_405290_YpMadaAmpseqUT_287	ACGCACTTGACTTGTCTTC	GTAGCATCATCAAAAGCTG	ACGCACTTGACTTGTCTTCGTAGCATCATCAAAAGCTG
410478	Yes	7	F	4	F_410478_YpMadaAmpseqUT_7	ACCCAACTGAATGGAGC	CATCTGGCTATACCGTTAAT	ACCCAACTGAATGGAGCCATCTGGCTATACCGTTAAT
410478	Yes	296	R	4	R_410478_YpMadaAmpseqUT_296	ACGCACTTGACTTGTCTTC	TTTCGTAAGTAATTTGGGGT	ACGCACTTGACTTGTCTTCTTTCGTAAGTAATTTGGGGT
420544	Yes	1	F	3	F_420544_YpMadaAmpseqUT_1	ACCCAACTGAATGGAGC	TAGATTGGCTATCAACGC	ACCCAACTGAATGGAGCTAGATTGGCTATCAACGC
420544	Yes	288	R	3	R_420544_YpMadaAmpseqUT_288	ACGCACTTGACTTGTCTTC	CGTAAATATTACTCGGTGGA	ACGCACTTGACTTGTCTTCCGTAAATATTACTCGGTGGA
421770	Yes	5	F	3	F_421770_YpMadaAmpseqUT_5	ACCCAACTGAATGGAGC	GAACACTTTGTGAGCAATAT	ACCCAACTGAATGGAGCGAACACTTTGTGAGCAATAT
421770	Yes	254	R	3	R_421770_YpMadaAmpseqUT_254	ACGCACTTGACTTGTCTTC	CGGATTATACCAGTGGAAA	ACGCACTTGACTTGTCTTCCGGATTATACCAGTGGAAA
427892	Yes	6	F	3	F_427892_YpMadaAmpseqUT_6	ACCCAACTGAATGGAGC	GATCCCCCGTAAATATTGG	ACCCAACTGAATGGAGCGATCCCCCGTAAATATTGG
427892	Yes	295	R	3	R_427892_YpMadaAmpseqUT_295	ACGCACTTGACTTGTCTTC	CTGGTGATATTTATGCTGTG	ACGCACTTGACTTGTCTTCCTGGTGATATTTATGCTGTG
486737	Yes	37	F	3	F_486737_YpMadaAmpseqUT_37	ACCCAACTGAATGGAGC	CTGTGGTATTTCCGGATC	ACCCAACTGAATGGAGCCTGTGGTATTTCCGGATC
486737	Yes	300	R	3	R_486737_YpMadaAmpseqUT_300	ACGCACTTGACTTGTCTTC	AACGGGAAAAATAGCCCC	ACGCACTTGACTTGTCTTCAACGGGAAAAATAGCCCC
510779	Yes	4	F	3	F_510779_YpMadaAmpseqUT_4	ACCCAACTGAATGGAGC	ACCCGTAAAATTTCACTAAC	ACCCAACTGAATGGAGCACCCGTAAAATTTCACTAAC
510779	Yes	261	R	3	R_510779_YpMadaAmpseqUT_261	ACGCACTTGACTTGTCTTC	CGTAACGGCTTGAATTAATT	ACGCACTTGACTTGTCTTCCGTAACGGCTTGAATTAATT
524611	Yes	5	F	3	F_524611_YpMadaAmpseqUT_5	ACCCAACTGAATGGAGC	TAACGTTTCAACCACATAGT	ACCCAACTGAATGGAGCTAACGTTTCAACCACATAGT
524611	Yes	300	R	3	R_524611_YpMadaAmpseqUT_300	ACGCACTTGACTTGTCTTC	ACAATAATCGTCTAGTGATCA	ACGCACTTGACTTGTCTTCACAATAATCGTCTAGTGATCA
569377	Yes	0	F	3	F_569377_YpMadaAmpseqUT_0	ACCCAACTGAATGGAGC	TATGTTTTCCTTGCCGGA	ACCCAACTGAATGGAGCTATGTTTTCCTTGCCGGA
569377	Yes	273	R	3	R_569377_YpMadaAmpseqUT_273	ACGCACTTGACTTGTCTTC	GCTGAAGTGCTGAATTGT	ACGCACTTGACTTGTCTTCGCTGAAGTGCTGAATTGT
573262	Yes	30	F	4	F_573262_YpMadaAmpseqUT_30	ACCCAACTGAATGGAGC	GCAGATTTTTAATGCCATCT	ACCCAACTGAATGGAGCGCAGATTTTTAATGCCATCT
573262	Yes	279	R	4	R_573262_YpMadaAmpseqUT_279	ACGCACTTGACTTGTCTTC	CTAAGCCTCTCTCACTTTG	ACGCACTTGACTTGTCTTCCTAAGCCTCTCTCACTTTG
581519	Yes	7	F	4	F_581519_YpMadaAmpseqUT_7	ACCCAACTGAATGGAGC	TTCGGAACTGATTGTTTTTC	ACCCAACTGAATGGAGCTTCGGAACTGATTGTTTTTC
581519	Yes	270	R	4	R_581519_YpMadaAmpseqUT_270	ACGCACTTGACTTGTCTTC	GCGCTATGGCAAATAATATT	ACGCACTTGACTTGTCTTCGCGCTATGGCAAATAATATT
583692	Yes	8	F	1	F_583692_YpMadaAmpseqUT_8	ACCCAACTGAATGGAGC	GCGATTAATTTGTTCACCAT	ACCCAACTGAATGGAGCGCGATTAATTTGTTCACCAT
583692	Yes	298	R	1	R_583692_YpMadaAmpseqUT_298	ACGCACTTGACTTGTCTTC	ATTCTCCGCACTAAAGATAA	ACGCACTTGACTTGTCTTCATTCTCCGCACTAAAGATAA
636120	Yes	26	F	4	F_636120_YpMadaAmpseqUT_26	ACCCAACTGAATGGAGC	ATTTATTATTCAGGAGCGGT	ACCCAACTGAATGGAGCATTTATTATTCAGGAGCGGT
636120	Yes	285	R	4	R_636120_YpMadaAmpseqUT_285	ACGCACTTGACTTGTCTTC	GCCAACTGACTCATATAAGA	ACGCACTTGACTTGTCTTCGCCAACTGACTCATATAAGA
709503	Yes	4	F	1	F_709503_YpMadaAmpseqUT_4	ACCCAACTGAATGGAGC	TATAGCGTTTTTCTTCAGCT	ACCCAACTGAATGGAGCTATAGCGTTTTTCTTCAGCT
709503	Yes	279	R	1	R_709503_YpMadaAmpseqUT_279	ACGCACTTGACTTGTCTTC	ATTTTAACCTGTTTTAGCCG	ACGCACTTGACTTGTCTTCATTTTAACCTGTTTTAGCCG
734391	Yes	7	F	4	F_734391_YpMadaAmpseqUT_7	ACCCAACTGAATGGAGC	TTTTCACGGAGAAGATATGT	ACCCAACTGAATGGAGCTTTTCACGGAGAAGATATGT
734391	Yes	285	R	4	R_734391_YpMadaAmpseqUT_285	ACGCACTTGACTTGTCTTC	ACGTCATCACCATTAAAAAC	ACGCACTTGACTTGTCTTCACGTCATCACCATTAAAAAC
742102	Yes	38	F	4	F_742102_YpMadaAmpseqUT_38	ACCCAACTGAATGGAGC	ATTCAGCCGTGAGTTTAAA	ACCCAACTGAATGGAGCATTCAGCCGTGAGTTTAAA
742102	Yes	287	R	4	R_742102_YpMadaAmpseqUT_287	ACGCACTTGACTTGTCTTC	TGATTTTACCCATTGTTCTG	ACGCACTTGACTTGTCTTCTGATTTTACCCATTGTTCTG
777894	Yes	1	F	2	F_777894_YpMadaAmpseqUT_1	ACCCAACTGAATGGAGC	AGTAAGGTGATGTTGATAAAAA	ACCCAACTGAATGGAGCAGTAAGGTGATGTTGATAAAAA
777894	Yes	300	R	2	R_777894_YpMadaAmpseqUT_300	ACGCACTTGACTTGTCTTC	AAAACTGGCTAACTCAGATT	ACGCACTTGACTTGTCTTCAAAACTGGCTAACTCAGATT
788894	Yes	48	F	4	F_788894_YpMadaAmpseqUT_48	ACCCAACTGAATGGAGC	ATCCCCAGTGATTTTCAAA	ACCCAACTGAATGGAGCATCCCCAGTGATTTTCAAA
788894	Yes	300	R	4	R_788894_YpMadaAmpseqUT_300	ACGCACTTGACTTGTCTTC	TACGGGCATTAAACACCA	ACGCACTTGACTTGTCTTCTACGGGCATTAAACACCA
800631	Yes	11	F	2	F_800631_YpMadaAmpseqUT_11	ACCCAACTGAATGGAGC	GAATTACCGCCTCATTAGT	ACCCAACTGAATGGAGCGAATTACCGCCTCATTAGT
800631	Yes	267	R	2	R_800631_YpMadaAmpseqUT_267	ACGCACTTGACTTGTCTTC	CTTTTCTTTCTGCAATGACA	ACGCACTTGACTTGTCTTCCTTTTCTTTCTGCAATGACA
808488	Yes	22	F	2	F_808488_YpMadaAmpseqUT_22	ACCCAACTGAATGGAGC	CTACTGCGATTCATCAGG	ACCCAACTGAATGGAGCCTACTGCGATTCATCAGG
808488	Yes	298	R	2	R_808488_YpMadaAmpseqUT_298	ACGCACTTGACTTGTCTTC	TGCCAATAACAATACCCTTT	ACGCACTTGACTTGTCTTCTGCCAATAACAATACCCTTT
860565	Yes	39	F	2	F_860565_YpMadaAmpseqUT_39	ACCCAACTGAATGGAGC	AAGCACTCCACAATGATG	ACCCAACTGAATGGAGCAAGCACTCCACAATGATG
860565	Yes	288	R	2	R_860565_YpMadaAmpseqUT_288	ACGCACTTGACTTGTCTTC	CGATGTTATTCCCAACTTC	ACGCACTTGACTTGTCTTCCGATGTTATTCCCAACTTC
880088	Yes	42	F	2	F_880088_YpMadaAmpseqUT_42	ACCCAACTGAATGGAGC	ATCCATATCCTGAGCAAAC	ACCCAACTGAATGGAGCATCCATATCCTGAGCAAAC
880088	Yes	298	R	2	R_880088_YpMadaAmpseqUT_298	ACGCACTTGACTTGTCTTC	CATAAATCGAGCGAATCATG	ACGCACTTGACTTGTCTTCCATAAATCGAGCGAATCATG
883401	Yes	9	F	3	F_883401_YpMadaAmpseqUT_9	ACCCAACTGAATGGAGC	GATAGCTGTCCTGAGATTG	ACCCAACTGAATGGAGCGATAGCTGTCCTGAGATTG
883401	Yes	270	R	3	R_883401_YpMadaAmpseqUT_270	ACGCACTTGACTTGTCTTC	TTTTCTTTGTTGCAGATCTT	ACGCACTTGACTTGTCTTCTTTTCTTTGTTGCAGATCTT
928266	Yes	24	F	4	F_928266_YpMadaAmpseqUT_24	ACCCAACTGAATGGAGC	TCTTGATACCGTGCTAATC	ACCCAACTGAATGGAGCTCTTGATACCGTGCTAATC
928266	Yes	282	R	4	R_928266_YpMadaAmpseqUT_282	ACGCACTTGACTTGTCTTC	TGGTTCACCAAAATCCAATA	ACGCACTTGACTTGTCTTCTGGTTCACCAAAATCCAATA
940590	Yes	17	F	3	F_940590_YpMadaAmpseqUT_17	ACCCAACTGAATGGAGC	GAAGAAGACATGGTCAATTT	ACCCAACTGAATGGAGCGAAGAAGACATGGTCAATTT
940590	Yes	267	R	3	R_940590_YpMadaAmpseqUT_267	ACGCACTTGACTTGTCTTC	GCTATTCCCGACGATTTATA	ACGCACTTGACTTGTCTTCGCTATTCCCGACGATTTATA
945033	Yes	4	F	2	F_945033_YpMadaAmpseqUT_4	ACCCAACTGAATGGAGC	TCATCAGATCAGATAATCGC	ACCCAACTGAATGGAGCTCATCAGATCAGATAATCGC
945033	Yes	300	R	2	R_945033_YpMadaAmpseqUT_300	ACGCACTTGACTTGTCTTC	ATAGAACCCCGTTTTAAACA	ACGCACTTGACTTGTCTTCATAGAACCCCGTTTTAAACA
1019231	Yes	21	F	4	F_1019231_YpMadaAmpseqUT_21	ACCCAACTGAATGGAGC	CAAGGACGTTAATGCTTG	ACCCAACTGAATGGAGCCAAGGACGTTAATGCTTG
1019231	Yes	300	R	4	R_1019231_YpMadaAmpseqUT_300	ACGCACTTGACTTGTCTTC	TTCTTGTTTTTGCGAGAATT	ACGCACTTGACTTGTCTTCTTCTTGTTTTTGCGAGAATT
1027352	Yes	9	F	2	F_1027352_YpMadaAmpseqUT_9	ACCCAACTGAATGGAGC	ATCGTAATGGACCCTATTTC	ACCCAACTGAATGGAGCATCGTAATGGACCCTATTTC
1027352	Yes	287	R	2	R_1027352_YpMadaAmpseqUT_287	ACGCACTTGACTTGTCTTC	GGCATAGATAAACTCGGTAT	ACGCACTTGACTTGTCTTCGGCATAGATAAACTCGGTAT
1031220	Yes	22	F	4	F_1031220_YpMadaAmpseqUT_22	ACCCAACTGAATGGAGC	TTCGAGGTGTTATCCAATAC	ACCCAACTGAATGGAGCTTCGAGGTGTTATCCAATAC
1031220	Yes	277	R	4	R_1031220_YpMadaAmpseqUT_277	ACGCACTTGACTTGTCTTC	GGAACATTTGTTGTAACAGA	ACGCACTTGACTTGTCTTCGGAACATTTGTTGTAACAGA
1032416	Yes	26	F	2	F_1032416_YpMadaAmpseqUT_26	ACCCAACTGAATGGAGC	GAAAATATTCGCCCGTAAC	ACCCAACTGAATGGAGCGAAAATATTCGCCCGTAAC
1032416	Yes	298	R	2	R_1032416_YpMadaAmpseqUT_298	ACGCACTTGACTTGTCTTC	GGCTTTAACAAACAGGATTT	ACGCACTTGACTTGTCTTCGGCTTTAACAAACAGGATTT
1097296	Yes	0	F	2	F_1097296_YpMadaAmpseqUT_0	ACCCAACTGAATGGAGC	CAACAAATTTGCAGCCAC	ACCCAACTGAATGGAGCCAACAAATTTGCAGCCAC
1097296	Yes	286	R	2	R_1097296_YpMadaAmpseqUT_286	ACGCACTTGACTTGTCTTC	AACCACACTTTTATTAACGG	ACGCACTTGACTTGTCTTCAACCACACTTTTATTAACGG
1098112	Yes	1	F	2	F_1098112_YpMadaAmpseqUT_1	ACCCAACTGAATGGAGC	TAAACCACTTAATTTTGCCC	ACCCAACTGAATGGAGCTAAACCACTTAATTTTGCCC
1098112	Yes	266	R	2	R_1098112_YpMadaAmpseqUT_266	ACGCACTTGACTTGTCTTC	CAAACGTCATCGGTAAAATG	ACGCACTTGACTTGTCTTCCAAACGTCATCGGTAAAATG
1143043	Yes	9	F	2	F_1143043_YpMadaAmpseqUT_9	ACCCAACTGAATGGAGC	TACCTTGTCCCATATTTTGG	ACCCAACTGAATGGAGCTACCTTGTCCCATATTTTGG
1143043	Yes	265	R	2	R_1143043_YpMadaAmpseqUT_265	ACGCACTTGACTTGTCTTC	GATCGTAATTACATACCGCT	ACGCACTTGACTTGTCTTCGATCGTAATTACATACCGCT
1179222	Yes	6	F	2	F_1179222_YpMadaAmpseqUT_6	ACCCAACTGAATGGAGC	CAGTACACATGGTGATTTAC	ACCCAACTGAATGGAGCCAGTACACATGGTGATTTAC
1179222	Yes	298	R	2	R_1179222_YpMadaAmpseqUT_298	ACGCACTTGACTTGTCTTC	CAACAAAAATCCCAACTTGA	ACGCACTTGACTTGTCTTCCAACAAAAATCCCAACTTGA
1249035	Yes	4	F	2	F_1249035_YpMadaAmpseqUT_4	ACCCAACTGAATGGAGC	GCTGAGGATATTGTTTTGTT	ACCCAACTGAATGGAGCGCTGAGGATATTGTTTTGTT
1249035	Yes	292	R	2	R_1249035_YpMadaAmpseqUT_292	ACGCACTTGACTTGTCTTC	CTACGCAAATCAATCATCTC	ACGCACTTGACTTGTCTTCCTACGCAAATCAATCATCTC
1301393	Yes	7	F	2	F_1301393_YpMadaAmpseqUT_7	ACCCAACTGAATGGAGC	ATGGAAATAGCTCAAAAACC	ACCCAACTGAATGGAGCATGGAAATAGCTCAAAAACC
1301393	Yes	268	R	2	R_1301393_YpMadaAmpseqUT_268	ACGCACTTGACTTGTCTTC	GGAAAAACCACGTTGATTAA	ACGCACTTGACTTGTCTTCGGAAAAACCACGTTGATTAA
1337859	Yes	7	F	2	F_1337859_YpMadaAmpseqUT_7	ACCCAACTGAATGGAGC	AACAGATACAACATCGGTT	ACCCAACTGAATGGAGCAACAGATACAACATCGGTT
1337859	Yes	271	R	2	R_1337859_YpMadaAmpseqUT_271	ACGCACTTGACTTGTCTTC	GCAGTAATAAAGAACGCAAC	ACGCACTTGACTTGTCTTCGCAGTAATAAAGAACGCAAC
1354956	Yes	35	F	2	F_1354956_YpMadaAmpseqUT_35	ACCCAACTGAATGGAGC	GGAAGGAACATGTTGGTG	ACCCAACTGAATGGAGCGGAAGGAACATGTTGGTG
1354956	Yes	299	R	2	R_1354956_YpMadaAmpseqUT_299	ACGCACTTGACTTGTCTTC	GTTGATCGGTTCACTTTTTA	ACGCACTTGACTTGTCTTCGTTGATCGGTTCACTTTTTA
1356448	Yes	33	F	2	F_1356448_YpMadaAmpseqUT_33	ACCCAACTGAATGGAGC	CGATTGAACCTAAATTACCG	ACCCAACTGAATGGAGCCGATTGAACCTAAATTACCG
1356448	Yes	284	R	2	R_1356448_YpMadaAmpseqUT_284	ACGCACTTGACTTGTCTTC	ACGGTAATAAGCTGGATTTA	ACGCACTTGACTTGTCTTCACGGTAATAAGCTGGATTTA
1371194	Yes	41	F	3	F_1371194_YpMadaAmpseqUT_41	ACCCAACTGAATGGAGC	GATGCGTTATACCGAAATC	ACCCAACTGAATGGAGCGATGCGTTATACCGAAATC
1371194	Yes	290	R	3	R_1371194_YpMadaAmpseqUT_290	ACGCACTTGACTTGTCTTC	GTTTTCATCTTCTATATAAGCC	ACGCACTTGACTTGTCTTCGTTTTCATCTTCTATATAAGCC
1387705	Yes	5	F	3	F_1387705_YpMadaAmpseqUT_5	ACCCAACTGAATGGAGC	TTCTACAACAGAAAGTCCG	ACCCAACTGAATGGAGCTTCTACAACAGAAAGTCCG
1387705	Yes	273	R	3	R_1387705_YpMadaAmpseqUT_273	ACGCACTTGACTTGTCTTC	ATATACATGGCTTTCTACGT	ACGCACTTGACTTGTCTTCATATACATGGCTTTCTACGT
1390477	Yes	4	F	3	F_1390477_YpMadaAmpseqUT_4	ACCCAACTGAATGGAGC	CAATGGCTTAAGGGTCAG	ACCCAACTGAATGGAGCCAATGGCTTAAGGGTCAG
1390477	Yes	268	R	3	R_1390477_YpMadaAmpseqUT_268	ACGCACTTGACTTGTCTTC	GTATCTACAAGCCGTGAAT	ACGCACTTGACTTGTCTTCGTATCTACAAGCCGTGAAT
1448305	Yes	48	F	3	F_1448305_YpMadaAmpseqUT_48	ACCCAACTGAATGGAGC	CCTGTTTTAGCGGCTATATA	ACCCAACTGAATGGAGCCCTGTTTTAGCGGCTATATA
1448305	Yes	300	R	3	R_1448305_YpMadaAmpseqUT_300	ACGCACTTGACTTGTCTTC	ATACTCACTCATGTTGCG	ACGCACTTGACTTGTCTTCATACTCACTCATGTTGCG
1477711	Yes	43	F	3	F_1477711_YpMadaAmpseqUT_43	ACCCAACTGAATGGAGC	CTTTGCTTGGGATATCAATC	ACCCAACTGAATGGAGCCTTTGCTTGGGATATCAATC
1477711	Yes	294	R	3	R_1477711_YpMadaAmpseqUT_294	ACGCACTTGACTTGTCTTC	TCGACAAAAGTATATGACGG	ACGCACTTGACTTGTCTTCTCGACAAAAGTATATGACGG
1478166	No	39	F	3	F_1478166_YpMadaAmpseqUT_39	ACCCAACTGAATGGAGC	CCGAATCACTTACTTGAGTA	ACCCAACTGAATGGAGCCCGAATCACTTACTTGAGTA
1478166	No	298	R	3	R_1478166_YpMadaAmpseqUT_298	ACGCACTTGACTTGTCTTC	CAAAGAATAGCCTTCCAAAA	ACGCACTTGACTTGTCTTCCAAAGAATAGCCTTCCAAAA
1483916	Yes	4	F	3	F_1483916_YpMadaAmpseqUT_4	ACCCAACTGAATGGAGC	GATTCTCATCCATGGCTG	ACCCAACTGAATGGAGCGATTCTCATCCATGGCTG
1483916	Yes	266	R	3	R_1483916_YpMadaAmpseqUT_266	ACGCACTTGACTTGTCTTC	GCAATCTAAGCACTAAAGAG	ACGCACTTGACTTGTCTTCGCAATCTAAGCACTAAAGAG
1495082	Yes	31	F	3	F_1495082_YpMadaAmpseqUT_31	ACCCAACTGAATGGAGC	TGCCATTATGATGATTTTTGT	ACCCAACTGAATGGAGCTGCCATTATGATGATTTTTGT
1495082	Yes	284	R	3	R_1495082_YpMadaAmpseqUT_284	ACGCACTTGACTTGTCTTC	GATCAATCCCGACTAATTTG	ACGCACTTGACTTGTCTTCGATCAATCCCGACTAATTTG
1505007	Yes	42	F	3	F_1505007_YpMadaAmpseqUT_42	ACCCAACTGAATGGAGC	AGAGATAACGGCATCATAAC	ACCCAACTGAATGGAGCAGAGATAACGGCATCATAAC
1505007	Yes	294	R	3	R_1505007_YpMadaAmpseqUT_294	ACGCACTTGACTTGTCTTC	AAAATTACTATTGGCAACGT	ACGCACTTGACTTGTCTTCAAAATTACTATTGGCAACGT
1518912	Yes	9	F	3	F_1518912_YpMadaAmpseqUT_9	ACCCAACTGAATGGAGC	AGGTAAAGCTCGAACAATG	ACCCAACTGAATGGAGCAGGTAAAGCTCGAACAATG
1518912	Yes	276	R	3	R_1518912_YpMadaAmpseqUT_276	ACGCACTTGACTTGTCTTC	CTAGCATTTTGATTTTGGGT	ACGCACTTGACTTGTCTTCCTAGCATTTTGATTTTGGGT
1526648	Yes	6	F	3	F_1526648_YpMadaAmpseqUT_6	ACCCAACTGAATGGAGC	TCTTGTAGATCTGAGGTTTC	ACCCAACTGAATGGAGCTCTTGTAGATCTGAGGTTTC
1526648	Yes	271	R	3	R_1526648_YpMadaAmpseqUT_271	ACGCACTTGACTTGTCTTC	CTTTTCCTTCCCTATATCGA	ACGCACTTGACTTGTCTTCCTTTTCCTTCCCTATATCGA
1539852	Yes	1	F	3	F_1539852_YpMadaAmpseqUT_1	ACCCAACTGAATGGAGC	TTAAACCAGGGAAAAATACC	ACCCAACTGAATGGAGCTTAAACCAGGGAAAAATACC
1539852	Yes	287	R	3	R_1539852_YpMadaAmpseqUT_287	ACGCACTTGACTTGTCTTC	CAATTGGCAGCTAACATTAA	ACGCACTTGACTTGTCTTCCAATTGGCAGCTAACATTAA
1569898	Yes	3	F	3	F_1569898_YpMadaAmpseqUT_3	ACCCAACTGAATGGAGC	GAATCCCTGACCTTACAAC	ACCCAACTGAATGGAGCGAATCCCTGACCTTACAAC
1569898	Yes	276	R	3	R_1569898_YpMadaAmpseqUT_276	ACGCACTTGACTTGTCTTC	CCAAGAAAAGCGACAATG	ACGCACTTGACTTGTCTTCCCAAGAAAAGCGACAATG
1587123	Yes	24	F	3	F_1587123_YpMadaAmpseqUT_24	ACCCAACTGAATGGAGC	TTGACAGCATTGATATGACT	ACCCAACTGAATGGAGCTTGACAGCATTGATATGACT
1587123	Yes	277	R	3	R_1587123_YpMadaAmpseqUT_277	ACGCACTTGACTTGTCTTC	CAGCTTATCAACCAGATCTA	ACGCACTTGACTTGTCTTCCAGCTTATCAACCAGATCTA
1673035	Yes	25	F	3	F_1673035_YpMadaAmpseqUT_25	ACCCAACTGAATGGAGC	CTTTGTTTAGCTGAGAATCC	ACCCAACTGAATGGAGCCTTTGTTTAGCTGAGAATCC
1673035	Yes	275	R	3	R_1673035_YpMadaAmpseqUT_275	ACGCACTTGACTTGTCTTC	CGGAATGGTGTGTTGATTAA	ACGCACTTGACTTGTCTTCCGGAATGGTGTGTTGATTAA
1709270	Yes	8	F	4	F_1709270_YpMadaAmpseqUT_8	ACCCAACTGAATGGAGC	GATTAACACAGCAGATCTTG	ACCCAACTGAATGGAGCGATTAACACAGCAGATCTTG
1709270	Yes	273	R	4	R_1709270_YpMadaAmpseqUT_273	ACGCACTTGACTTGTCTTC	CATACTCGACATCCTGTATT	ACGCACTTGACTTGTCTTCCATACTCGACATCCTGTATT
1730274	Yes	36	F	4	F_1730274_YpMadaAmpseqUT_36	ACCCAACTGAATGGAGC	GATATTTCAGGTAAGTCCCC	ACCCAACTGAATGGAGCGATATTTCAGGTAAGTCCCC
1730274	Yes	294	R	4	R_1730274_YpMadaAmpseqUT_294	ACGCACTTGACTTGTCTTC	GCGTTTAAAAACCTATGTGA	ACGCACTTGACTTGTCTTCGCGTTTAAAAACCTATGTGA
1750751	Yes	29	F	2	F_1750751_YpMadaAmpseqUT_29	ACCCAACTGAATGGAGC	TAAAACCGAAACGATCACT	ACCCAACTGAATGGAGCTAAAACCGAAACGATCACT
1750751	Yes	279	R	2	R_1750751_YpMadaAmpseqUT_279	ACGCACTTGACTTGTCTTC	AAATACCACCATAACCGTTA	ACGCACTTGACTTGTCTTCAAATACCACCATAACCGTTA
1764050	Yes	3	F	1	F_1764050_YpMadaAmpseqUT_3	ACCCAACTGAATGGAGC	GATCTCTGATGCAGTGATAC	ACCCAACTGAATGGAGCGATCTCTGATGCAGTGATAC
1764050	Yes	271	R	1	R_1764050_YpMadaAmpseqUT_271	ACGCACTTGACTTGTCTTC	CCATTCTGGTATTACCGATT	ACGCACTTGACTTGTCTTCCCATTCTGGTATTACCGATT
1768207	Yes	49	F	2	F_1768207_YpMadaAmpseqUT_49	ACCCAACTGAATGGAGC	CAGACAAACAATGATACCAC	ACCCAACTGAATGGAGCCAGACAAACAATGATACCAC
1768207	Yes	298	R	2	R_1768207_YpMadaAmpseqUT_298	ACGCACTTGACTTGTCTTC	GTCACCAGTTGTTTGATTTT	ACGCACTTGACTTGTCTTCGTCACCAGTTGTTTGATTTT
1777083	Yes	3	F	2	F_1777083_YpMadaAmpseqUT_3	ACCCAACTGAATGGAGC	CTTGGAGTATGATGGGTATAA	ACCCAACTGAATGGAGCCTTGGAGTATGATGGGTATAA
1777083	Yes	277	R	2	R_1777083_YpMadaAmpseqUT_277	ACGCACTTGACTTGTCTTC	CACAAACTCCAAAACGTC	ACGCACTTGACTTGTCTTCCACAAACTCCAAAACGTC
1779306	Yes	45	F	2	F_1779306_YpMadaAmpseqUT_45	ACCCAACTGAATGGAGC	GATTAGTCGAGCTATAGAGG	ACCCAACTGAATGGAGCGATTAGTCGAGCTATAGAGG
1779306	Yes	295	R	2	R_1779306_YpMadaAmpseqUT_295	ACGCACTTGACTTGTCTTC	TTTCCCAACAACAGGATTTA	ACGCACTTGACTTGTCTTCTTTCCCAACAACAGGATTTA
1790788	Yes	31	F	2	F_1790788_YpMadaAmpseqUT_31	ACCCAACTGAATGGAGC	ATTTTAACGCTGGAATTGAG	ACCCAACTGAATGGAGCATTTTAACGCTGGAATTGAG
1790788	Yes	294	R	2	R_1790788_YpMadaAmpseqUT_294	ACGCACTTGACTTGTCTTC	CGGTAGCACTTATAAAGGTA	ACGCACTTGACTTGTCTTCCGGTAGCACTTATAAAGGTA
1799000	Yes	9	F	4	F_1799000_YpMadaAmpseqUT_9	ACCCAACTGAATGGAGC	GGGAAGAAATACCTGTTACA	ACCCAACTGAATGGAGCGGGAAGAAATACCTGTTACA
1799000	Yes	259	R	4	R_1799000_YpMadaAmpseqUT_259	ACGCACTTGACTTGTCTTC	AAAAGATAGAGCAAGTGGTA	ACGCACTTGACTTGTCTTCAAAAGATAGAGCAAGTGGTA
1865446	Yes	9	F	2	F_1865446_YpMadaAmpseqUT_9	ACCCAACTGAATGGAGC	CCGTTTCTTCCCATAACTC	ACCCAACTGAATGGAGCCCGTTTCTTCCCATAACTC
1865446	Yes	293	R	2	R_1865446_YpMadaAmpseqUT_293	ACGCACTTGACTTGTCTTC	GCAAGTACGTAGAATGACC	ACGCACTTGACTTGTCTTCGCAAGTACGTAGAATGACC
1891952	Yes	26	F	3	F_1891952_YpMadaAmpseqUT_26	ACCCAACTGAATGGAGC	AGGCTAATATTTAGGGTTTTT	ACCCAACTGAATGGAGCAGGCTAATATTTAGGGTTTTT
1891952	Yes	295	R	3	R_1891952_YpMadaAmpseqUT_295	ACGCACTTGACTTGTCTTC	GAATGTTACACTGCTTTGAT	ACGCACTTGACTTGTCTTCGAATGTTACACTGCTTTGAT
1915008	Yes	3	F	1	F_1915008_YpMadaAmpseqUT_3	ACCCAACTGAATGGAGC	TGATTTTGGTCAGTATCTGG	ACCCAACTGAATGGAGCTGATTTTGGTCAGTATCTGG
1915008	Yes	291	R	1	R_1915008_YpMadaAmpseqUT_291	ACGCACTTGACTTGTCTTC	CAGTACCTGTGTATCGATAT	ACGCACTTGACTTGTCTTCCAGTACCTGTGTATCGATAT
1956139	Yes	44	F	3	F_1956139_YpMadaAmpseqUT_44	ACCCAACTGAATGGAGC	TGGCGTTAATCATAAGTGTA	ACCCAACTGAATGGAGCTGGCGTTAATCATAAGTGTA
1956139	Yes	299	R	3	R_1956139_YpMadaAmpseqUT_299	ACGCACTTGACTTGTCTTC	GCATCCTGATAAGTGTGATA	ACGCACTTGACTTGTCTTCGCATCCTGATAAGTGTGATA
1997865	Yes	12	F	4	F_1997865_YpMadaAmpseqUT_12	ACCCAACTGAATGGAGC	CTTGACTACCGTAGTGATC	ACCCAACTGAATGGAGCCTTGACTACCGTAGTGATC
1997865	Yes	272	R	4	R_1997865_YpMadaAmpseqUT_272	ACGCACTTGACTTGTCTTC	CCCCGTTTCTTCGTTATG	ACGCACTTGACTTGTCTTCCCCCGTTTCTTCGTTATG
2000338	Yes	33	F	1	F_2000338_YpMadaAmpseqUT_33	ACCCAACTGAATGGAGC	TATAAGCATCAGTAACGGTG	ACCCAACTGAATGGAGCTATAAGCATCAGTAACGGTG
2000338	Yes	283	R	1	R_2000338_YpMadaAmpseqUT_283	ACGCACTTGACTTGTCTTC	AGCCGAATAAAAAGTATGAA	ACGCACTTGACTTGTCTTCAGCCGAATAAAAAGTATGAA
2011337	Yes	40	F	4	F_2011337_YpMadaAmpseqUT_40	ACCCAACTGAATGGAGC	CATAAAATTGGCCTAACCTC	ACCCAACTGAATGGAGCCATAAAATTGGCCTAACCTC
2011337	Yes	290	R	4	R_2011337_YpMadaAmpseqUT_290	ACGCACTTGACTTGTCTTC	GCATCGATCAATTCCAGT	ACGCACTTGACTTGTCTTCGCATCGATCAATTCCAGT
2021480	Yes	46	F	2	F_2021480_YpMadaAmpseqUT_46	ACCCAACTGAATGGAGC	TATTCTGCGAAATCAAGGT	ACCCAACTGAATGGAGCTATTCTGCGAAATCAAGGT
2021480	Yes	300	R	2	R_2021480_YpMadaAmpseqUT_300	ACGCACTTGACTTGTCTTC	TCGATGGTATTCATTTTTGC	ACGCACTTGACTTGTCTTCTCGATGGTATTCATTTTTGC
2022322	Yes	3	F	2	F_2022322_YpMadaAmpseqUT_3	ACCCAACTGAATGGAGC	TTCAATCGCCACTTCTTTA	ACCCAACTGAATGGAGCTTCAATCGCCACTTCTTTA
2022322	Yes	296	R	2	R_2022322_YpMadaAmpseqUT_296	ACGCACTTGACTTGTCTTC	AAAAACAGGTTAAATAGGCG	ACGCACTTGACTTGTCTTCAAAAACAGGTTAAATAGGCG
2088874	Yes	1	F	4	F_2088874_YpMadaAmpseqUT_1	ACCCAACTGAATGGAGC	AGAGCTGAATTTGAAAGAAA	ACCCAACTGAATGGAGCAGAGCTGAATTTGAAAGAAA
2088874	Yes	251	R	4	R_2088874_YpMadaAmpseqUT_251	ACGCACTTGACTTGTCTTC	AGGGGTTAGCCATTTTTAAT	ACGCACTTGACTTGTCTTCAGGGGTTAGCCATTTTTAAT
2202307	Yes	17	F	4	F_2202307_YpMadaAmpseqUT_17	ACCCAACTGAATGGAGC	CGTATTTTGAGGTGTTTGAA	ACCCAACTGAATGGAGCCGTATTTTGAGGTGTTTGAA
2202307	Yes	295	R	4	R_2202307_YpMadaAmpseqUT_295	ACGCACTTGACTTGTCTTC	TAATTCTAAAGCTCTGTTGC	ACGCACTTGACTTGTCTTCTAATTCTAAAGCTCTGTTGC
2258957	Yes	28	F	2	F_2258957_YpMadaAmpseqUT_28	ACCCAACTGAATGGAGC	AAGTTCTTTTCTACCCCTTC	ACCCAACTGAATGGAGCAAGTTCTTTTCTACCCCTTC
2258957	Yes	299	R	2	R_2258957_YpMadaAmpseqUT_299	ACGCACTTGACTTGTCTTC	AGTGATGATAATGCACAGTA	ACGCACTTGACTTGTCTTCAGTGATGATAATGCACAGTA
2263664	Yes	3	F	2	F_2263664_YpMadaAmpseqUT_3	ACCCAACTGAATGGAGC	TCCGGGTATTTTTAATACGT	ACCCAACTGAATGGAGCTCCGGGTATTTTTAATACGT
2263664	Yes	281	R	2	R_2263664_YpMadaAmpseqUT_281	ACGCACTTGACTTGTCTTC	TCTTTAAGGATTATCGCGTT	ACGCACTTGACTTGTCTTCTCTTTAAGGATTATCGCGTT
2272343	Yes	6	F	2	F_2272343_YpMadaAmpseqUT_6	ACCCAACTGAATGGAGC	ACATGTTTGTCAGAATTGC	ACCCAACTGAATGGAGCACATGTTTGTCAGAATTGC
2272343	Yes	270	R	2	R_2272343_YpMadaAmpseqUT_270	ACGCACTTGACTTGTCTTC	GATAATGCATCGTGGAGAT	ACGCACTTGACTTGTCTTCGATAATGCATCGTGGAGAT
2301508	Yes	29	F	2	F_2301508_YpMadaAmpseqUT_29	ACCCAACTGAATGGAGC	CATTAGCGTTATCAGTGTTT	ACCCAACTGAATGGAGCCATTAGCGTTATCAGTGTTT
2301508	Yes	288	R	2	R_2301508_YpMadaAmpseqUT_288	ACGCACTTGACTTGTCTTC	AAGTCTAGAAGAATTCAGCA	ACGCACTTGACTTGTCTTCAAGTCTAGAAGAATTCAGCA
2332994	Yes	9	F	2	F_2332994_YpMadaAmpseqUT_9	ACCCAACTGAATGGAGC	AAAGTAGGGCGTGATCTC	ACCCAACTGAATGGAGCAAAGTAGGGCGTGATCTC
2332994	Yes	282	R	2	R_2332994_YpMadaAmpseqUT_282	ACGCACTTGACTTGTCTTC	GAATACCAAAGACCGTTTG	ACGCACTTGACTTGTCTTCGAATACCAAAGACCGTTTG
2407118	Yes	24	F	2	F_2407118_YpMadaAmpseqUT_24	ACCCAACTGAATGGAGC	GTTGCGATTAATGTTCTGG	ACCCAACTGAATGGAGCGTTGCGATTAATGTTCTGG
2407118	Yes	282	R	2	R_2407118_YpMadaAmpseqUT_282	ACGCACTTGACTTGTCTTC	GGAGAAGATAATCGCTCAAT	ACGCACTTGACTTGTCTTCGGAGAAGATAATCGCTCAAT
2469939	Yes	22	F	2	F_2469939_YpMadaAmpseqUT_22	ACCCAACTGAATGGAGC	GACAAACCGTTTAAATCTGA	ACCCAACTGAATGGAGCGACAAACCGTTTAAATCTGA
2469939	Yes	276	R	2	R_2469939_YpMadaAmpseqUT_276	ACGCACTTGACTTGTCTTC	CTCAAAAGTATTACGTGGTG	ACGCACTTGACTTGTCTTCCTCAAAAGTATTACGTGGTG
2532931	Yes	8	F	2	F_2532931_YpMadaAmpseqUT_8	ACCCAACTGAATGGAGC	GGTGCCATAAACTTTTATGT	ACCCAACTGAATGGAGCGGTGCCATAAACTTTTATGT
2532931	Yes	259	R	2	R_2532931_YpMadaAmpseqUT_259	ACGCACTTGACTTGTCTTC	CCGAAGAAATTAACCGTTTA	ACGCACTTGACTTGTCTTCCCGAAGAAATTAACCGTTTA
2540495	Yes	42	F	2	F_2540495_YpMadaAmpseqUT_42	ACCCAACTGAATGGAGC	AACACCCACGCTATATTTAG	ACCCAACTGAATGGAGCAACACCCACGCTATATTTAG
2540495	Yes	292	R	2	R_2540495_YpMadaAmpseqUT_292	ACGCACTTGACTTGTCTTC	CAACAAACGGTACCATTAAT	ACGCACTTGACTTGTCTTCCAACAAACGGTACCATTAAT
2575621	Yes	25	F	3	F_2575621_YpMadaAmpseqUT_25	ACCCAACTGAATGGAGC	TACTCGAACGTTATACCAAC	ACCCAACTGAATGGAGCTACTCGAACGTTATACCAAC
2575621	Yes	285	R	3	R_2575621_YpMadaAmpseqUT_285	ACGCACTTGACTTGTCTTC	AATTTTTGATATTCGCGTCA	ACGCACTTGACTTGTCTTCAATTTTTGATATTCGCGTCA
2668833	Yes	5	F	3	F_2668833_YpMadaAmpseqUT_5	ACCCAACTGAATGGAGC	TAAAAACCAACAATTGCTCT	ACCCAACTGAATGGAGCTAAAAACCAACAATTGCTCT
2668833	Yes	267	R	3	R_2668833_YpMadaAmpseqUT_267	ACGCACTTGACTTGTCTTC	AACAACCCTCTCTGTTTTAA	ACGCACTTGACTTGTCTTCAACAACCCTCTCTGTTTTAA
2709130	Yes	1	F	3	F_2709130_YpMadaAmpseqUT_1	ACCCAACTGAATGGAGC	CAATATAGAACTCGACCGG	ACCCAACTGAATGGAGCCAATATAGAACTCGACCGG
2709130	Yes	285	R	3	R_2709130_YpMadaAmpseqUT_285	ACGCACTTGACTTGTCTTC	TTTATCACGAGCTACTGGA	ACGCACTTGACTTGTCTTCTTTATCACGAGCTACTGGA
2727750	Yes	6	F	1	F_2727750_YpMadaAmpseqUT_6	ACCCAACTGAATGGAGC	TTTACATTCAACAACGCTG	ACCCAACTGAATGGAGCTTTACATTCAACAACGCTG
2727750	Yes	279	R	1	R_2727750_YpMadaAmpseqUT_279	ACGCACTTGACTTGTCTTC	CTAAAACGGGTGAGGATATT	ACGCACTTGACTTGTCTTCCTAAAACGGGTGAGGATATT
2728627	Yes	27	F	3	F_2728627_YpMadaAmpseqUT_27	ACCCAACTGAATGGAGC	AAATAAATTGCAGCACTCTG	ACCCAACTGAATGGAGCAAATAAATTGCAGCACTCTG
2728627	Yes	285	R	3	R_2728627_YpMadaAmpseqUT_285	ACGCACTTGACTTGTCTTC	GATTATTCGAAAGCGGTTTA	ACGCACTTGACTTGTCTTCGATTATTCGAAAGCGGTTTA
2732085	Yes	8	F	3	F_2732085_YpMadaAmpseqUT_8	ACCCAACTGAATGGAGC	CCCTCTTCAATTCTGACTTA	ACCCAACTGAATGGAGCCCCTCTTCAATTCTGACTTA
2732085	Yes	292	R	3	R_2732085_YpMadaAmpseqUT_292	ACGCACTTGACTTGTCTTC	CGTATATCGTGTTGCTTTC	ACGCACTTGACTTGTCTTCCGTATATCGTGTTGCTTTC
2745401	Yes	6	F	3	F_2745401_YpMadaAmpseqUT_6	ACCCAACTGAATGGAGC	GCCGATATTCAATTGGAATC	ACCCAACTGAATGGAGCGCCGATATTCAATTGGAATC
2745401	Yes	297	R	3	R_2745401_YpMadaAmpseqUT_297	ACGCACTTGACTTGTCTTC	TACACAGAATTATGGACAGG	ACGCACTTGACTTGTCTTCTACACAGAATTATGGACAGG
2768041	Yes	34	F	1	F_2768041_YpMadaAmpseqUT_34	ACCCAACTGAATGGAGC	TTTATGGCATTGGGATATCA	ACCCAACTGAATGGAGCTTTATGGCATTGGGATATCA
2768041	Yes	300	R	1	R_2768041_YpMadaAmpseqUT_300	ACGCACTTGACTTGTCTTC	CCATGGTCTGTCTGTTTTA	ACGCACTTGACTTGTCTTCCCATGGTCTGTCTGTTTTA
2873673	Yes	35	F	3	F_2873673_YpMadaAmpseqUT_35	ACCCAACTGAATGGAGC	CTGGATGGTGTTGAACGG	ACCCAACTGAATGGAGCCTGGATGGTGTTGAACGG
2873673	Yes	300	R	3	R_2873673_YpMadaAmpseqUT_300	ACGCACTTGACTTGTCTTC	CAATACGTGGGAACATATAC	ACGCACTTGACTTGTCTTCCAATACGTGGGAACATATAC
2898136	Yes	35	F	3	F_2898136_YpMadaAmpseqUT_35	ACCCAACTGAATGGAGC	TCATGAATATGGTAATGGCA	ACCCAACTGAATGGAGCTCATGAATATGGTAATGGCA
2898136	Yes	284	R	3	R_2898136_YpMadaAmpseqUT_284	ACGCACTTGACTTGTCTTC	CTGATCATGCTGTGCTTC	ACGCACTTGACTTGTCTTCCTGATCATGCTGTGCTTC
2902611	Yes	31	F	3	F_2902611_YpMadaAmpseqUT_31	ACCCAACTGAATGGAGC	GAATATCCGTGACCAAAAAG	ACCCAACTGAATGGAGCGAATATCCGTGACCAAAAAG
2902611	Yes	296	R	3	R_2902611_YpMadaAmpseqUT_296	ACGCACTTGACTTGTCTTC	CCAAGAGTGCATGTATTTC	ACGCACTTGACTTGTCTTCCCAAGAGTGCATGTATTTC
2972852	Yes	18	F	3	F_2972852_YpMadaAmpseqUT_18	ACCCAACTGAATGGAGC	AATTCTGCTGCGGATAAC	ACCCAACTGAATGGAGCAATTCTGCTGCGGATAAC
2972852	Yes	267	R	3	R_2972852_YpMadaAmpseqUT_267	ACGCACTTGACTTGTCTTC	GTGATCCTCGCCATTATTTT	ACGCACTTGACTTGTCTTCGTGATCCTCGCCATTATTTT
3037913	Yes	42	F	3	F_3037913_YpMadaAmpseqUT_42	ACCCAACTGAATGGAGC	CCACATAAATAAACGCAACT	ACCCAACTGAATGGAGCCCACATAAATAAACGCAACT
3037913	Yes	295	R	3	R_3037913_YpMadaAmpseqUT_295	ACGCACTTGACTTGTCTTC	GTACCGATTTAGATGGGTTA	ACGCACTTGACTTGTCTTCGTACCGATTTAGATGGGTTA
3062333	Yes	50	F	3	F_3062333_YpMadaAmpseqUT_50	ACCCAACTGAATGGAGC	GACACATCGAACTGATACC	ACCCAACTGAATGGAGCGACACATCGAACTGATACC
3062333	Yes	300	R	3	R_3062333_YpMadaAmpseqUT_300	ACGCACTTGACTTGTCTTC	CAGCGTGAATCACTTCAG	ACGCACTTGACTTGTCTTCCAGCGTGAATCACTTCAG
3085743	Yes	51	F	3	F_3085743_YpMadaAmpseqUT_51	ACCCAACTGAATGGAGC	CTACGGAATAAGTCATGGAT	ACCCAACTGAATGGAGCCTACGGAATAAGTCATGGAT
3085743	Yes	300	R	3	R_3085743_YpMadaAmpseqUT_300	ACGCACTTGACTTGTCTTC	TGCTGCTTTAGGTTAACC	ACGCACTTGACTTGTCTTCTGCTGCTTTAGGTTAACC
3119740	Yes	2	F	3	F_3119740_YpMadaAmpseqUT_2	ACCCAACTGAATGGAGC	GTAAAACCTGGTTTATTCCG	ACCCAACTGAATGGAGCGTAAAACCTGGTTTATTCCG
3119740	Yes	290	R	3	R_3119740_YpMadaAmpseqUT_290	ACGCACTTGACTTGTCTTC	AGGGTGTAGGTGGTATTG	ACGCACTTGACTTGTCTTCAGGGTGTAGGTGGTATTG
3146638	Yes	28	F	1	F_3146638_YpMadaAmpseqUT_28	ACCCAACTGAATGGAGC	TCTTGAAATAAACGCACTTC	ACCCAACTGAATGGAGCTCTTGAAATAAACGCACTTC
3146638	Yes	293	R	1	R_3146638_YpMadaAmpseqUT_293	ACGCACTTGACTTGTCTTC	GGAGATAAAATCCGGTATCT	ACGCACTTGACTTGTCTTCGGAGATAAAATCCGGTATCT
3188566	Yes	27	F	1	F_3188566_YpMadaAmpseqUT_27	ACCCAACTGAATGGAGC	GTATTGATAACCATGCACTG	ACCCAACTGAATGGAGCGTATTGATAACCATGCACTG
3188566	Yes	300	R	1	R_3188566_YpMadaAmpseqUT_300	ACGCACTTGACTTGTCTTC	TATTGTCTTGATCAACCACC	ACGCACTTGACTTGTCTTCTATTGTCTTGATCAACCACC
3209650	Yes	37	F	2	F_3209650_YpMadaAmpseqUT_37	ACCCAACTGAATGGAGC	ATCAGTAAGTTAGGTACCGT	ACCCAACTGAATGGAGCATCAGTAAGTTAGGTACCGT
3209650	Yes	296	R	2	R_3209650_YpMadaAmpseqUT_296	ACGCACTTGACTTGTCTTC	CACTTTACTCTTCTGCCTAT	ACGCACTTGACTTGTCTTCCACTTTACTCTTCTGCCTAT
3224274	Yes	9	F	1	F_3224274_YpMadaAmpseqUT_9	ACCCAACTGAATGGAGC	AAAATAACTGATGCCAAAGT	ACCCAACTGAATGGAGCAAAATAACTGATGCCAAAGT
3224274	Yes	300	R	1	R_3224274_YpMadaAmpseqUT_300	ACGCACTTGACTTGTCTTC	CTAATTTTTCTTGCTGTCCC	ACGCACTTGACTTGTCTTCCTAATTTTTCTTGCTGTCCC
3254954	Yes	18	F	2	F_3254954_YpMadaAmpseqUT_18	ACCCAACTGAATGGAGC	ATCACGTTACACTCATTTAAC	ACCCAACTGAATGGAGCATCACGTTACACTCATTTAAC
3254954	Yes	267	R	2	R_3254954_YpMadaAmpseqUT_267	ACGCACTTGACTTGTCTTC	CAGAAGTGGTATTGTCGAT	ACGCACTTGACTTGTCTTCCAGAAGTGGTATTGTCGAT
3260882	Yes	8	F	4	F_3260882_YpMadaAmpseqUT_8	ACCCAACTGAATGGAGC	TTCACACAATGTCGGTTTA	ACCCAACTGAATGGAGCTTCACACAATGTCGGTTTA
3260882	Yes	289	R	4	R_3260882_YpMadaAmpseqUT_289	ACGCACTTGACTTGTCTTC	TAAAGGTGATTAAGTGTCGT	ACGCACTTGACTTGTCTTCTAAAGGTGATTAAGTGTCGT
3298519	Yes	23	F	1	F_3298519_YpMadaAmpseqUT_23	ACCCAACTGAATGGAGC	AAATGCTATCAACCACCAT	ACCCAACTGAATGGAGCAAATGCTATCAACCACCAT
3298519	Yes	291	R	1	R_3298519_YpMadaAmpseqUT_291	ACGCACTTGACTTGTCTTC	CGTTTCTTTGGCTTCATTAT	ACGCACTTGACTTGTCTTCCGTTTCTTTGGCTTCATTAT
3324378	Yes	15	F	2	F_3324378_YpMadaAmpseqUT_15	ACCCAACTGAATGGAGC	CTCTCTCCTCATGTGGAT	ACCCAACTGAATGGAGCCTCTCTCCTCATGTGGAT
3324378	Yes	280	R	2	R_3324378_YpMadaAmpseqUT_280	ACGCACTTGACTTGTCTTC	AGTAATATGTAAGCCATTGC	ACGCACTTGACTTGTCTTCAGTAATATGTAAGCCATTGC
3352157	Yes	0	F	2	F_3352157_YpMadaAmpseqUT_0	ACCCAACTGAATGGAGC	CATGTTGGTCTCAGTGAC	ACCCAACTGAATGGAGCCATGTTGGTCTCAGTGAC
3352157	Yes	267	R	2	R_3352157_YpMadaAmpseqUT_267	ACGCACTTGACTTGTCTTC	GGGGAAGAAACCAAAAATG	ACGCACTTGACTTGTCTTCGGGGAAGAAACCAAAAATG
3370778	Yes	13	F	2	F_3370778_YpMadaAmpseqUT_13	ACCCAACTGAATGGAGC	AACCAATCGCCAAGGAAA	ACCCAACTGAATGGAGCAACCAATCGCCAAGGAAA
3370778	Yes	275	R	2	R_3370778_YpMadaAmpseqUT_275	ACGCACTTGACTTGTCTTC	GTAGTGGTTCTCGGTATTC	ACGCACTTGACTTGTCTTCGTAGTGGTTCTCGGTATTC
3402332	Yes	39	F	1	F_3402332_YpMadaAmpseqUT_39	ACCCAACTGAATGGAGC	ATACATACACTTACGGCATG	ACCCAACTGAATGGAGCATACATACACTTACGGCATG
3402332	Yes	298	R	1	R_3402332_YpMadaAmpseqUT_298	ACGCACTTGACTTGTCTTC	TAGGAACTCTCTTTATTCGC	ACGCACTTGACTTGTCTTCTAGGAACTCTCTTTATTCGC
3422625	Yes	24	F	1	F_3422625_YpMadaAmpseqUT_24	ACCCAACTGAATGGAGC	GAGTGTTCTGCCTTTCTTTA	ACCCAACTGAATGGAGCGAGTGTTCTGCCTTTCTTTA
3422625	Yes	299	R	1	R_3422625_YpMadaAmpseqUT_299	ACGCACTTGACTTGTCTTC	ATATCAGGGATGAGTAAACG	ACGCACTTGACTTGTCTTCATATCAGGGATGAGTAAACG
3438397	Yes	1	F	1	F_3438397_YpMadaAmpseqUT_1	ACCCAACTGAATGGAGC	AGCCAGATCATTGACTAAG	ACCCAACTGAATGGAGCAGCCAGATCATTGACTAAG
3438397	Yes	250	R	1	R_3438397_YpMadaAmpseqUT_250	ACGCACTTGACTTGTCTTC	AGAATAAATTGACCCGCATA	ACGCACTTGACTTGTCTTCAGAATAAATTGACCCGCATA
3459570	Yes	30	F	1	F_3459570_YpMadaAmpseqUT_30	ACCCAACTGAATGGAGC	GTTTTGGTAGATGAACTCTG	ACCCAACTGAATGGAGCGTTTTGGTAGATGAACTCTG
3459570	Yes	282	R	1	R_3459570_YpMadaAmpseqUT_282	ACGCACTTGACTTGTCTTC	TACAAATGGATAAGAAACGC	ACGCACTTGACTTGTCTTCTACAAATGGATAAGAAACGC
3464856	Yes	67	F	4	F_3464856_YpMadaAmpseqUT_67	ACCCAACTGAATGGAGC	TGAAACATTAGCCTTTTGAC	ACCCAACTGAATGGAGCTGAAACATTAGCCTTTTGAC
3464856	Yes	300	R	4	R_3464856_YpMadaAmpseqUT_300	ACGCACTTGACTTGTCTTC	GGGGAAATATATTTAGCGGT	ACGCACTTGACTTGTCTTCGGGGAAATATATTTAGCGGT
3476034	Yes	0	F	1	F_3476034_YpMadaAmpseqUT_0	ACCCAACTGAATGGAGC	TTTTTATCGATTAAGCCGTG	ACCCAACTGAATGGAGCTTTTTATCGATTAAGCCGTG
3476034	Yes	261	R	1	R_3476034_YpMadaAmpseqUT_261	ACGCACTTGACTTGTCTTC	GATGCGGATGAAATGAGTA	ACGCACTTGACTTGTCTTCGATGCGGATGAAATGAGTA
3477296	Yes	9	F	1	F_3477296_YpMadaAmpseqUT_9	ACCCAACTGAATGGAGC	TGATCTGAGTATTTGCTGAT	ACCCAACTGAATGGAGCTGATCTGAGTATTTGCTGAT
3477296	Yes	276	R	1	R_3477296_YpMadaAmpseqUT_276	ACGCACTTGACTTGTCTTC	CCAAAGACAGCCAATTAATC	ACGCACTTGACTTGTCTTCCCAAAGACAGCCAATTAATC
3504440	No	41	F	1	F_3504440_YpMadaAmpseqUT_41	ACCCAACTGAATGGAGC	TAGACCACATAGCACCAA	ACCCAACTGAATGGAGCTAGACCACATAGCACCAA
3504440	No	296	R	1	R_3504440_YpMadaAmpseqUT_296	ACGCACTTGACTTGTCTTC	GACAATCTATCAGCGCTATA	ACGCACTTGACTTGTCTTCGACAATCTATCAGCGCTATA
3531011	Yes	51	F	1	F_3531011_YpMadaAmpseqUT_51	ACCCAACTGAATGGAGC	TTTATCGCAATGGAACTCTA	ACCCAACTGAATGGAGCTTTATCGCAATGGAACTCTA
3531011	Yes	300	R	1	R_3531011_YpMadaAmpseqUT_300	ACGCACTTGACTTGTCTTC	ATACACAGATCCAGACCA	ACGCACTTGACTTGTCTTCATACACAGATCCAGACCA
3587425	Yes	2	F	1	F_3587425_YpMadaAmpseqUT_2	ACCCAACTGAATGGAGC	AAAGAGTCCGAGTTGATAAA	ACCCAACTGAATGGAGCAAAGAGTCCGAGTTGATAAA
3587425	Yes	295	R	1	R_3587425_YpMadaAmpseqUT_295	ACGCACTTGACTTGTCTTC	GCGTTAATGAGTTGCTAAAT	ACGCACTTGACTTGTCTTCGCGTTAATGAGTTGCTAAAT
3618315	Yes	4	F	4	F_3618315_YpMadaAmpseqUT_4	ACCCAACTGAATGGAGC	ATTGGTTTTACCTGAGATCC	ACCCAACTGAATGGAGCATTGGTTTTACCTGAGATCC
3618315	Yes	268	R	4	R_3618315_YpMadaAmpseqUT_268	ACGCACTTGACTTGTCTTC	TGGAGTGGACTTTGTTAATA	ACGCACTTGACTTGTCTTCTGGAGTGGACTTTGTTAATA
3632036	Yes	21	F	2	F_3632036_YpMadaAmpseqUT_21	ACCCAACTGAATGGAGC	ATTATCCGTTAGTGGCATAC	ACCCAACTGAATGGAGCATTATCCGTTAGTGGCATAC
3632036	Yes	280	R	2	R_3632036_YpMadaAmpseqUT_280	ACGCACTTGACTTGTCTTC	GGAAAGGGATGAAACAAATC	ACGCACTTGACTTGTCTTCGGAAAGGGATGAAACAAATC
3638935	Yes	11	F	2	F_3638935_YpMadaAmpseqUT_11	ACCCAACTGAATGGAGC	GTGAAGAATTGCAACACG	ACCCAACTGAATGGAGCGTGAAGAATTGCAACACG
3638935	Yes	265	R	2	R_3638935_YpMadaAmpseqUT_265	ACGCACTTGACTTGTCTTC	GCGTACCACTACTGATTTC	ACGCACTTGACTTGTCTTCGCGTACCACTACTGATTTC
3764233	No	23	F	2	F_3764233_YpMadaAmpseqUT_23	ACCCAACTGAATGGAGC	ACCTTGTCAATAGGAAACTT	ACCCAACTGAATGGAGCACCTTGTCAATAGGAAACTT
3764233	No	295	R	2	R_3764233_YpMadaAmpseqUT_295	ACGCACTTGACTTGTCTTC	TTAATTAAAAACCCGCTTCG	ACGCACTTGACTTGTCTTCTTAATTAAAAACCCGCTTCG
3792519	Yes	4	F	2	F_3792519_YpMadaAmpseqUT_4	ACCCAACTGAATGGAGC	TATTTCCGGTTCACTGTATT	ACCCAACTGAATGGAGCTATTTCCGGTTCACTGTATT
3792519	Yes	298	R	2	R_3792519_YpMadaAmpseqUT_298	ACGCACTTGACTTGTCTTC	GCAAAAAGCGATTCAACC	ACGCACTTGACTTGTCTTCGCAAAAAGCGATTCAACC
3795438	Yes	6	F	2	F_3795438_YpMadaAmpseqUT_6	ACCCAACTGAATGGAGC	GCATTTCAAGCTGATTCTT	ACCCAACTGAATGGAGCGCATTTCAAGCTGATTCTT
3795438	Yes	266	R	2	R_3795438_YpMadaAmpseqUT_266	ACGCACTTGACTTGTCTTC	CGACGGATACCAATTTCTA	ACGCACTTGACTTGTCTTCCGACGGATACCAATTTCTA
3859818	Yes	29	F	2	F_3859818_YpMadaAmpseqUT_29	ACCCAACTGAATGGAGC	CGAATGCCCATACCTATG	ACCCAACTGAATGGAGCCGAATGCCCATACCTATG
3859818	Yes	299	R	2	R_3859818_YpMadaAmpseqUT_299	ACGCACTTGACTTGTCTTC	CCAGCAAGGTGATTTCCC	ACGCACTTGACTTGTCTTCCCAGCAAGGTGATTTCCC
3890852	Yes	8	F	2	F_3890852_YpMadaAmpseqUT_8	ACCCAACTGAATGGAGC	GATTTTGCCAGCAGAAAC	ACCCAACTGAATGGAGCGATTTTGCCAGCAGAAAC
3890852	Yes	269	R	2	R_3890852_YpMadaAmpseqUT_269	ACGCACTTGACTTGTCTTC	GCAGACTAACTTCTTGTTGA	ACGCACTTGACTTGTCTTCGCAGACTAACTTCTTGTTGA
3918640	Yes	51	F	2	F_3918640_YpMadaAmpseqUT_51	ACCCAACTGAATGGAGC	AACAGTGAAATGCAAGAAAT	ACCCAACTGAATGGAGCAACAGTGAAATGCAAGAAAT
3918640	Yes	300	R	2	R_3918640_YpMadaAmpseqUT_300	ACGCACTTGACTTGTCTTC	CCCTCGATAGCATTAATAAC	ACGCACTTGACTTGTCTTCCCCTCGATAGCATTAATAAC
3985663	Yes	4	F	2	F_3985663_YpMadaAmpseqUT_4	ACCCAACTGAATGGAGC	GATATCTGCAACTTTTAGGC	ACCCAACTGAATGGAGCGATATCTGCAACTTTTAGGC
3985663	Yes	293	R	2	R_3985663_YpMadaAmpseqUT_293	ACGCACTTGACTTGTCTTC	AGATTTACTGAATTGCCTGA	ACGCACTTGACTTGTCTTCAGATTTACTGAATTGCCTGA
3986765	Yes	1	F	2	F_3986765_YpMadaAmpseqUT_1	ACCCAACTGAATGGAGC	ACTTTGGGTATAACAACTCG	ACCCAACTGAATGGAGCACTTTGGGTATAACAACTCG
3986765	Yes	266	R	2	R_3986765_YpMadaAmpseqUT_266	ACGCACTTGACTTGTCTTC	GGTGCTAGTAAAACTGATTG	ACGCACTTGACTTGTCTTCGGTGCTAGTAAAACTGATTG
4067141	Yes	21	F	3	F_4067141_YpMadaAmpseqUT_21	ACCCAACTGAATGGAGC	ACGAAAACGGAAGAAACT	ACCCAACTGAATGGAGCACGAAAACGGAAGAAACT
4067141	Yes	298	R	3	R_4067141_YpMadaAmpseqUT_298	ACGCACTTGACTTGTCTTC	GCGTACTTGATAGCAAAAAT	ACGCACTTGACTTGTCTTCGCGTACTTGATAGCAAAAAT
4075977	Yes	45	F	3	F_4075977_YpMadaAmpseqUT_45	ACCCAACTGAATGGAGC	CGGTGGTGTTTAATTTTAGT	ACCCAACTGAATGGAGCCGGTGGTGTTTAATTTTAGT
4075977	Yes	297	R	3	R_4075977_YpMadaAmpseqUT_297	ACGCACTTGACTTGTCTTC	GTATTAGCCAGCTTCGAC	ACGCACTTGACTTGTCTTCGTATTAGCCAGCTTCGAC
4125988	Yes	32	F	3	F_4125988_YpMadaAmpseqUT_32	ACCCAACTGAATGGAGC	TCCACCACGGATTTAAATC	ACCCAACTGAATGGAGCTCCACCACGGATTTAAATC
4125988	Yes	297	R	3	R_4125988_YpMadaAmpseqUT_297	ACGCACTTGACTTGTCTTC	CCATAATGGCTGTTAAAACT	ACGCACTTGACTTGTCTTCCCATAATGGCTGTTAAAACT
4132947	No	46	F	4	F_4132947_YpMadaAmpseqUT_46	ACCCAACTGAATGGAGC	ATCGGTTTTCGGTCTTATTA	ACCCAACTGAATGGAGCATCGGTTTTCGGTCTTATTA
4132947	No	300	R	4	R_4132947_YpMadaAmpseqUT_300	ACGCACTTGACTTGTCTTC	AGTAATAGCCAACCTATTCA	ACGCACTTGACTTGTCTTCAGTAATAGCCAACCTATTCA
4186689	Yes	4	F	3	F_4186689_YpMadaAmpseqUT_4	ACCCAACTGAATGGAGC	GATAGCGTAAAATAGCGATAG	ACCCAACTGAATGGAGCGATAGCGTAAAATAGCGATAG
4186689	Yes	255	R	3	R_4186689_YpMadaAmpseqUT_255	ACGCACTTGACTTGTCTTC	CGGCCTTATCATCAAAAATA	ACGCACTTGACTTGTCTTCCGGCCTTATCATCAAAAATA
4247539	Yes	5	F	3	F_4247539_YpMadaAmpseqUT_5	ACCCAACTGAATGGAGC	CAAACTATTAAACCATGGCA	ACCCAACTGAATGGAGCCAAACTATTAAACCATGGCA
4247539	Yes	298	R	3	R_4247539_YpMadaAmpseqUT_298	ACGCACTTGACTTGTCTTC	CCGAAACAGATCGATAAATG	ACGCACTTGACTTGTCTTCCCGAAACAGATCGATAAATG
4275851	Yes	25	F	3	F_4275851_YpMadaAmpseqUT_25	ACCCAACTGAATGGAGC	TTCTAGTACAATGAACCTCG	ACCCAACTGAATGGAGCTTCTAGTACAATGAACCTCG
4275851	Yes	297	R	3	R_4275851_YpMadaAmpseqUT_297	ACGCACTTGACTTGTCTTC	ACTTCTCTGACACACAAATC	ACGCACTTGACTTGTCTTCACTTCTCTGACACACAAATC
4334184	Yes	35	F	3	F_4334184_YpMadaAmpseqUT_35	ACCCAACTGAATGGAGC	AAAAATCAATTTTGCACTTTG	ACCCAACTGAATGGAGCAAAAATCAATTTTGCACTTTG
4334184	Yes	284	R	3	R_4334184_YpMadaAmpseqUT_284	ACGCACTTGACTTGTCTTC	CTGATCGAAGCCAGTACT	ACGCACTTGACTTGTCTTCCTGATCGAAGCCAGTACT
4354919	Yes	7	F	3	F_4354919_YpMadaAmpseqUT_7	ACCCAACTGAATGGAGC	AAAATGGCTACCGACCAA	ACCCAACTGAATGGAGCAAAATGGCTACCGACCAA
4354919	Yes	272	R	3	R_4354919_YpMadaAmpseqUT_272	ACGCACTTGACTTGTCTTC	CGCATTGAATCAGGAACG	ACGCACTTGACTTGTCTTCCGCATTGAATCAGGAACG
4358726	Yes	2	F	3	F_4358726_YpMadaAmpseqUT_2	ACCCAACTGAATGGAGC	CCCGTTCTCTCAATTAGATT	ACCCAACTGAATGGAGCCCCGTTCTCTCAATTAGATT
4358726	Yes	293	R	3	R_4358726_YpMadaAmpseqUT_293	ACGCACTTGACTTGTCTTC	TAAGGTCAACAACTAAGTGA	ACGCACTTGACTTGTCTTCTAAGGTCAACAACTAAGTGA
4380406	Yes	21	F	3	F_4380406_YpMadaAmpseqUT_21	ACCCAACTGAATGGAGC	GTAAATACATCAGCGTACTG	ACCCAACTGAATGGAGCGTAAATACATCAGCGTACTG
4380406	Yes	290	R	3	R_4380406_YpMadaAmpseqUT_290	ACGCACTTGACTTGTCTTC	TCATGGCTATCGCTGGAG	ACGCACTTGACTTGTCTTCTCATGGCTATCGCTGGAG
4404925	Yes	32	F	3	F_4404925_YpMadaAmpseqUT_32	ACCCAACTGAATGGAGC	GTTTTGCAAGATTCCATGG	ACCCAACTGAATGGAGCGTTTTGCAAGATTCCATGG
4404925	Yes	299	R	3	R_4404925_YpMadaAmpseqUT_299	ACGCACTTGACTTGTCTTC	ATCCTGACAGTGGTTATATG	ACGCACTTGACTTGTCTTCATCCTGACAGTGGTTATATG
4409865	Yes	47	F	3	F_4409865_YpMadaAmpseqUT_47	ACCCAACTGAATGGAGC	TGACAGCATTTCTACATAGG	ACCCAACTGAATGGAGCTGACAGCATTTCTACATAGG
4409865	Yes	300	R	3	R_4409865_YpMadaAmpseqUT_300	ACGCACTTGACTTGTCTTC	TCGATAAAGTGGGTGATTTA	ACGCACTTGACTTGTCTTCTCGATAAAGTGGGTGATTTA
4460559	Yes	42	F	3	F_4460559_YpMadaAmpseqUT_42	ACCCAACTGAATGGAGC	GTAACAATAAATGGCGGC	ACCCAACTGAATGGAGCGTAACAATAAATGGCGGC
4460559	Yes	300	R	3	R_4460559_YpMadaAmpseqUT_300	ACGCACTTGACTTGTCTTC	CTAACCTACTCAATATCGCC	ACGCACTTGACTTGTCTTCCTAACCTACTCAATATCGCC
4477784	Yes	8	F	3	F_4477784_YpMadaAmpseqUT_8	ACCCAACTGAATGGAGC	GTATCCTGCAAATTGAACTG	ACCCAACTGAATGGAGCGTATCCTGCAAATTGAACTG
4477784	Yes	272	R	3	R_4477784_YpMadaAmpseqUT_272	ACGCACTTGACTTGTCTTC	GCCTTTTGTACATCAATGAC	ACGCACTTGACTTGTCTTCGCCTTTTGTACATCAATGAC
4500423	Yes	13	F	3	F_4500423_YpMadaAmpseqUT_13	ACCCAACTGAATGGAGC	TTTGCCATCAGTAGAGTAAG	ACCCAACTGAATGGAGCTTTGCCATCAGTAGAGTAAG
4500423	Yes	296	R	3	R_4500423_YpMadaAmpseqUT_296	ACGCACTTGACTTGTCTTC	AAAAACAAATTTTAGCGACG	ACGCACTTGACTTGTCTTCAAAAACAAATTTTAGCGACG
4510729	Yes	18	F	1	F_4510729_YpMadaAmpseqUT_18	ACCCAACTGAATGGAGC	AAAATAATCATGATCGCGAC	ACCCAACTGAATGGAGCAAAATAATCATGATCGCGAC
4510729	Yes	281	R	1	R_4510729_YpMadaAmpseqUT_281	ACGCACTTGACTTGTCTTC	TGTTGGGGGAGGATTATAT	ACGCACTTGACTTGTCTTCTGTTGGGGGAGGATTATAT
4559266	Yes	40	F	1	F_4559266_YpMadaAmpseqUT_40	ACCCAACTGAATGGAGC	ACTGCCGAGTTATTATTCAG	ACCCAACTGAATGGAGCACTGCCGAGTTATTATTCAG
4559266	Yes	293	R	1	R_4559266_YpMadaAmpseqUT_293	ACGCACTTGACTTGTCTTC	GGTAACCCAGAACTGTAAAA	ACGCACTTGACTTGTCTTCGGTAACCCAGAACTGTAAAA
4592451	Yes	20	F	1	F_4592451_YpMadaAmpseqUT_20	ACCCAACTGAATGGAGC	GAACCACCTTCTCATTGC	ACCCAACTGAATGGAGCGAACCACCTTCTCATTGC
4592451	Yes	272	R	1	R_4592451_YpMadaAmpseqUT_272	ACGCACTTGACTTGTCTTC	GTTGCTGATCTGAGTGAAA	ACGCACTTGACTTGTCTTCGTTGCTGATCTGAGTGAAA
4628365	Yes	6	F	1	F_4628365_YpMadaAmpseqUT_6	ACCCAACTGAATGGAGC	GAATCAAACAGGTTAACCAG	ACCCAACTGAATGGAGCGAATCAAACAGGTTAACCAG
4628365	Yes	276	R	1	R_4628365_YpMadaAmpseqUT_276	ACGCACTTGACTTGTCTTC	GTAATCTGACCTCTCACAG	ACGCACTTGACTTGTCTTCGTAATCTGACCTCTCACAG
4635545	Yes	28	F	1	F_4635545_YpMadaAmpseqUT_28	ACCCAACTGAATGGAGC	AACGAAATATTCTTCAGTGC	ACCCAACTGAATGGAGCAACGAAATATTCTTCAGTGC
4635545	Yes	277	R	1	R_4635545_YpMadaAmpseqUT_277	ACGCACTTGACTTGTCTTC	GTGTTATTGATCACCTTGTG	ACGCACTTGACTTGTCTTCGTGTTATTGATCACCTTGTG
4637847	Yes	4	F	1	F_4637847_YpMadaAmpseqUT_4	ACCCAACTGAATGGAGC	TAATCTGAGTTTTCCAAGCT	ACCCAACTGAATGGAGCTAATCTGAGTTTTCCAAGCT
4637847	Yes	285	R	1	R_4637847_YpMadaAmpseqUT_285	ACGCACTTGACTTGTCTTC	CAACTGAGCACAGCTTTA	ACGCACTTGACTTGTCTTCCAACTGAGCACAGCTTTA
4644083	Yes	7	F	1	F_4644083_YpMadaAmpseqUT_7	ACCCAACTGAATGGAGC	TAACGTTGCAGAATAGACTG	ACCCAACTGAATGGAGCTAACGTTGCAGAATAGACTG
4644083	Yes	270	R	1	R_4644083_YpMadaAmpseqUT_270	ACGCACTTGACTTGTCTTC	GGAACGTATTACTTCCACTA	ACGCACTTGACTTGTCTTCGGAACGTATTACTTCCACTA
aCO92 position.
bIndicates whether a SNP was used in this analysis.
cF: Forward, R: Reverse.
